# Supplementary material for: Epigenetic Modulation of SPCA2 Reverses Epithelial to Mesenchymal Transition in Breast Cancer Cells
Source: PubMed Central journal article supplement (PMC7827456; doi:10.3390/cancers13020259), 2021-01-12
Supplement: cancers-13-00259-s001.pdf [file cancers-13-00259-s001.pdf]

# Epigenetic Modulation of SPCA2 Reverses Epithelial to Mesenchymal Transition in Breast Cancer Cells

Monish Ram Makena, Myungjun Ko, Donna Kimberly Dang and Rajini Rao

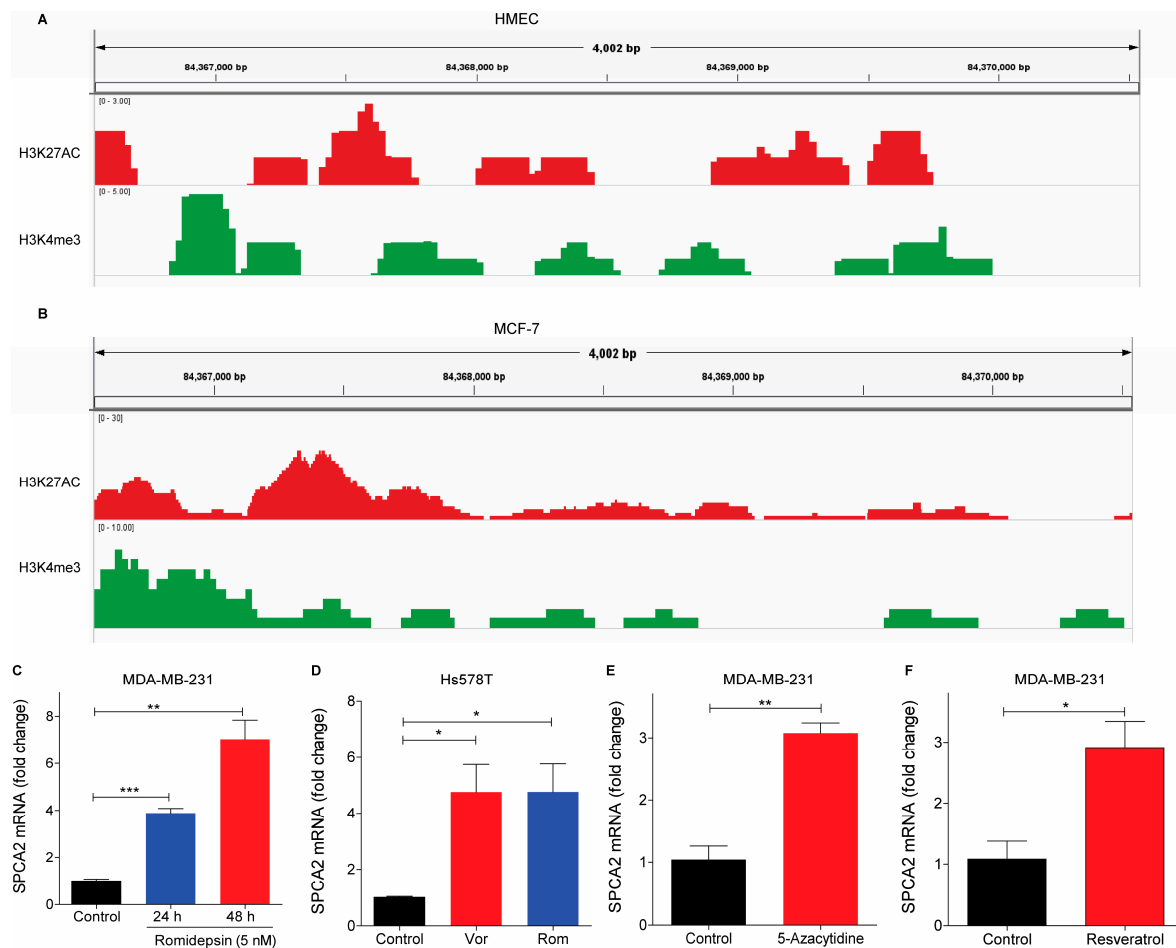

**Figure S1.** Epigenetic modification in SPCA promoter region. (A–B) Epigenetic modification of the promoter region of SPCA2, showing histone acetylation (H3K27AC) and methylation (H3K4me3), in (A) HMEC and (B) MCF-7 cells, as described in Methods. Not the scale bar differences, showing increased acetylation and methylation in MCF-7, compared to HMEC. (C) Treatment of MDA-MB-231 cells with HDAC inhibitors romidepsin showed a time-dependent increase in SPCA2 expression.  $n = 3$ . (D) Treatment of HS578T cells with HDAC inhibitors vorinostat (2.5  $\mu$ M) and romidepsin (5 nM) for 24 h significantly increased SPCA2. (E–F) Treatment of MDA-MB-231 cells with DNA methyltransferase inhibitor (5-Azacytidine, 10  $\mu$ M, 48 h) and sirtuin activator (Resveratrol, 2.5  $\mu$ M, 24 h) significantly increased SPCA2  $n = 3$ . Student's  $t$ -test, \*\*\* $p < 0.001$ , \*\* $p < 0.01$ , \* $p < 0.05$ .

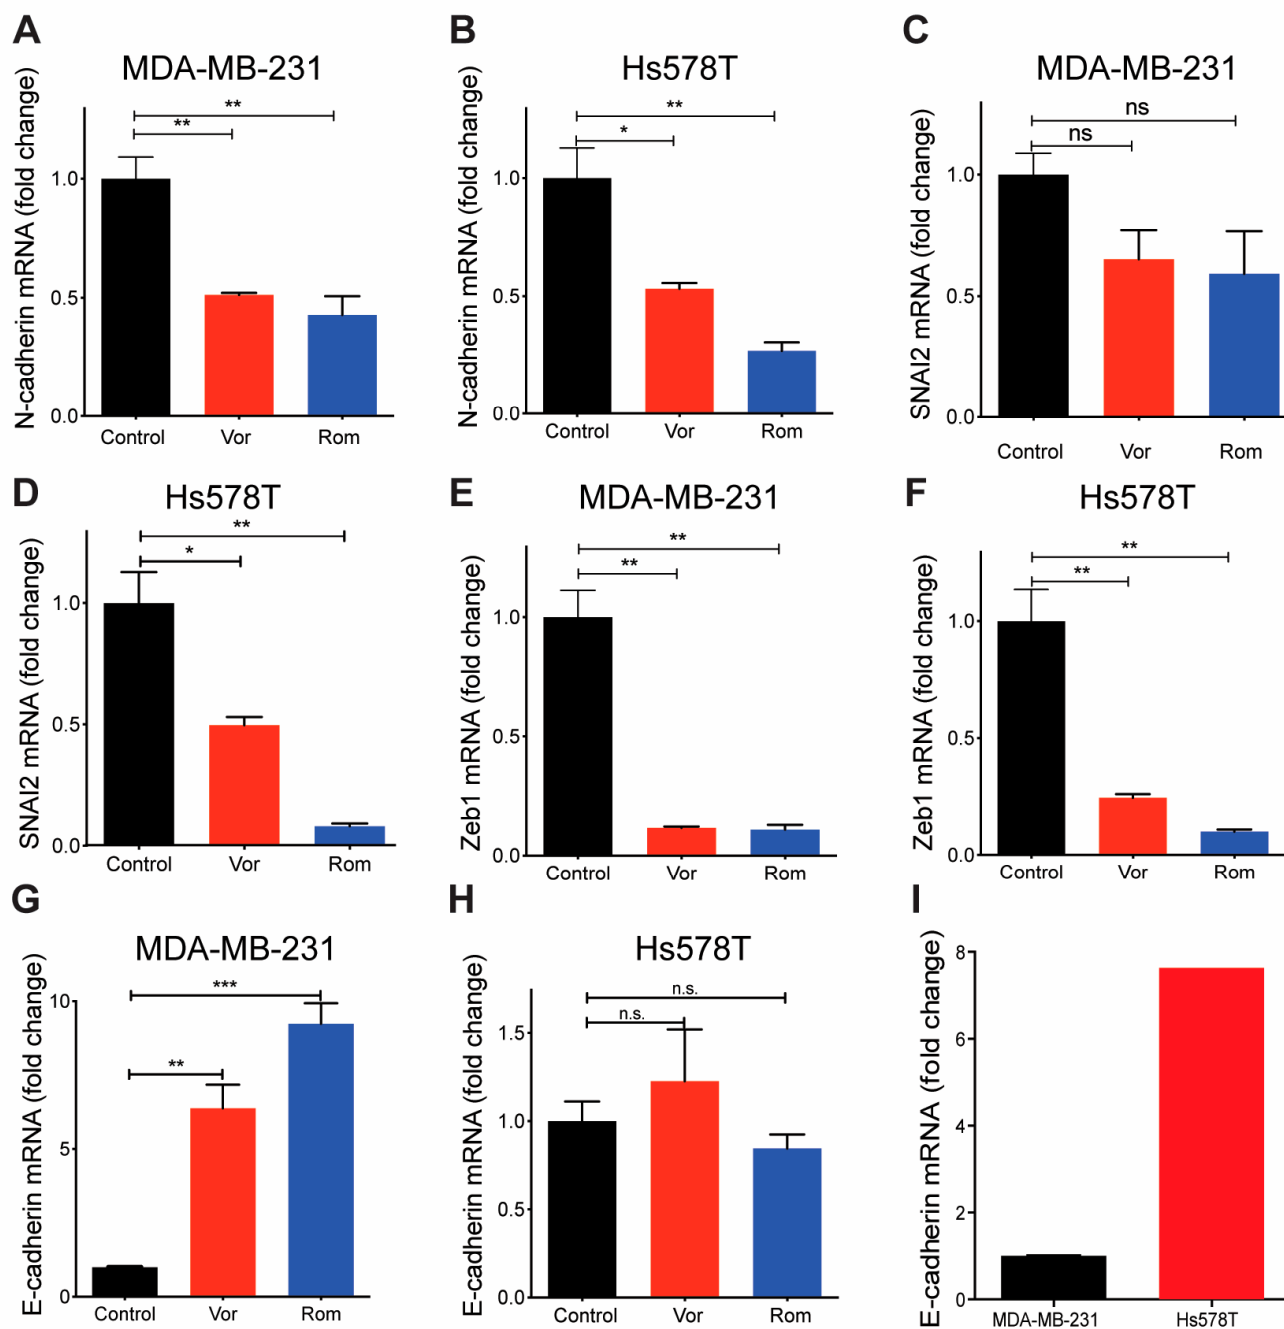

**Figure S2.** HDAC inhibitors promote MET phenotype TNBC cells. (A–F) Treatment of MDA-MB-231 and Hs578T cells, as shown, with vorinostat (2.5  $\mu$ M) and romidepsin (5 nM) for 24 h decreases expression of several mesenchymal gene markers. Transcripts were determined by qPCR,  $n = 3$ . (G–H) Treatment with vorinostat (2.5  $\mu$ M) and romidepsin (5 nM) for 24 h significantly increased transcript of the epithelial gene marker E-cadherin (CDH1) in MDA-MB-231 cells, but not in Hs578T cells;  $n = 3$ . (I) Hs578T has 7-fold higher endogenous CDH1 expression compared to MDA-MB-231, in the absence of HDACi. Student  $t$ -test, \*\*\* $p < 0.001$ , \*\* $p < 0.01$ , \* $p < 0.05$ , ns  $p > 0.05$ .

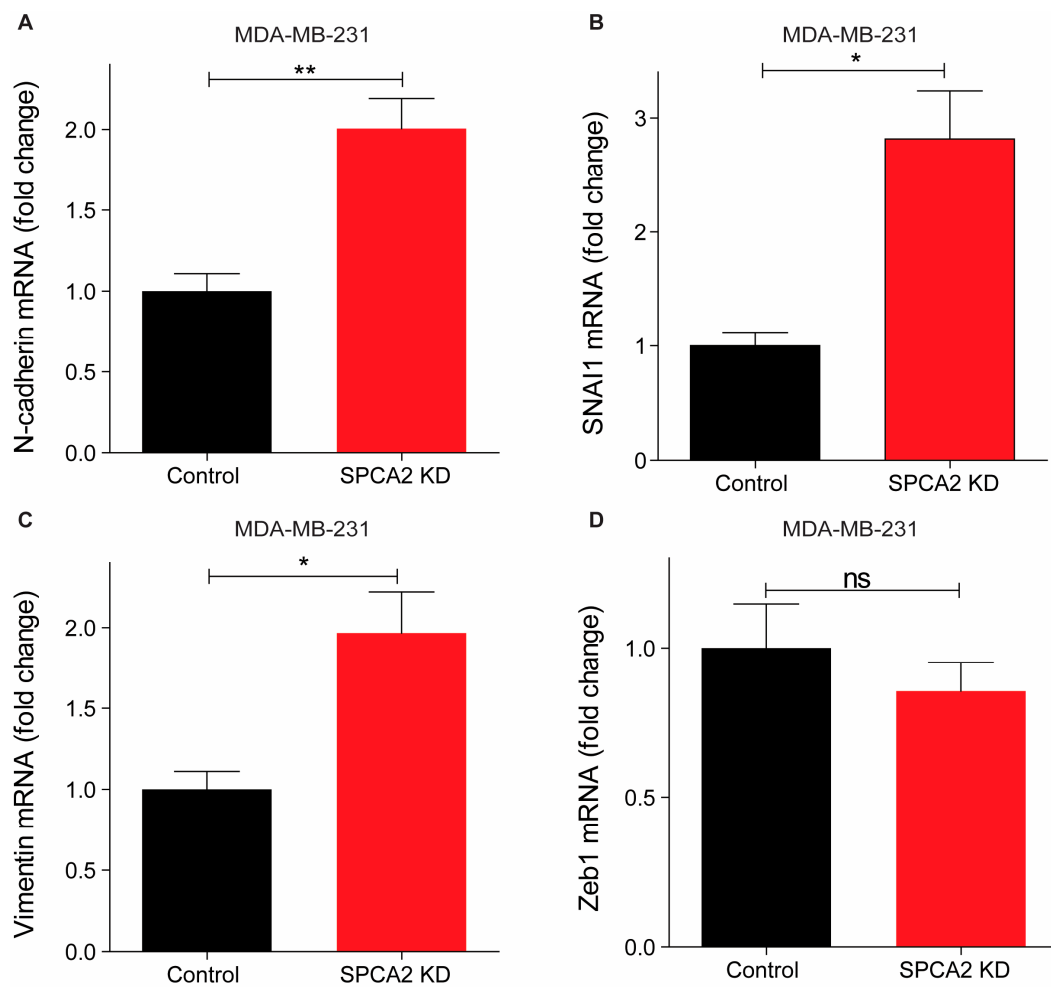

**Figure S3.** SPCA2 KD induced EMT changes in TNBC cell lines. (A–C) Knockdown of SPCA2 in MDA-MB-231 increased mesenchymal gene markers N-cadherin, SNAI1 and vimentin. (D) Knockdown of SPCA2 in MDA-MB-231 did not significantly increase mesenchymal gene marker Zeb1.  $n = 3$ . \*\* $p < 0.01$ , \* $p < 0.05$ , ns  $p > 0.05$ .

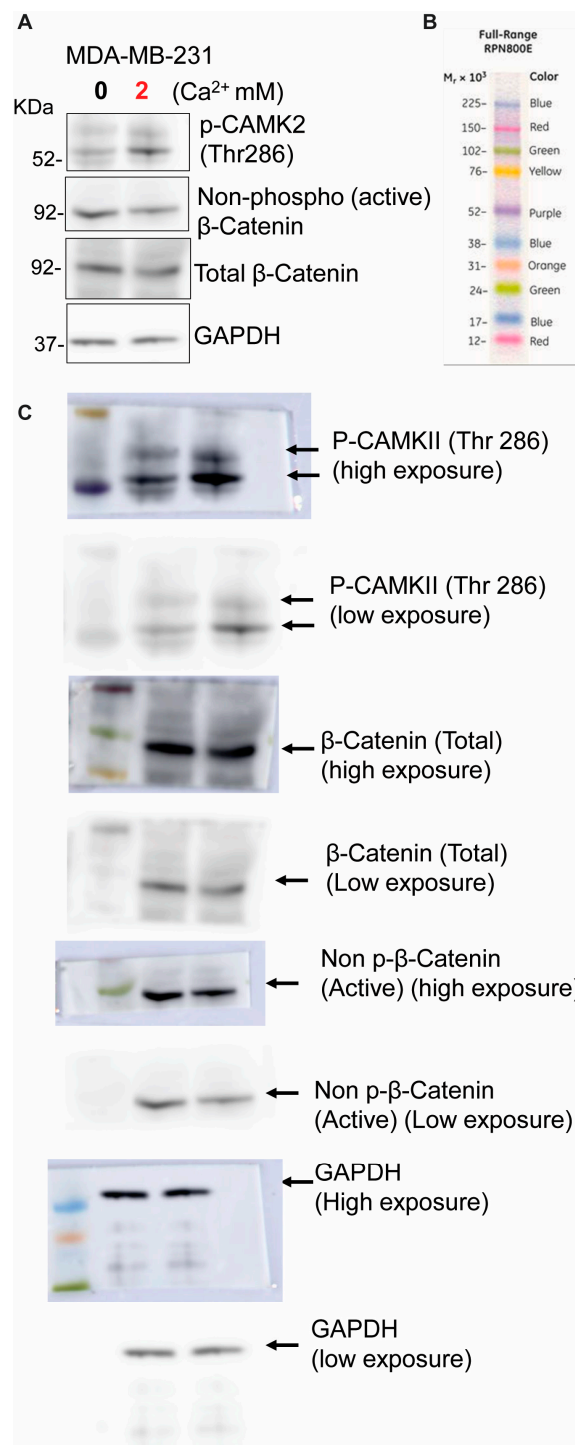

**Figure 4.** Extracellular Ca entry can also activate non-canonical Wnt/Ca pathway. **(A)** MDA-MD-231 were maintained in DMEM with 0 mM and 2 mM calcium for 42 h. Extracellular Ca entry activated non-canonical Wnt/Ca pathway. **(B)** Amersham™ ECL™ Rainbow™ Marker (RPN800E, Sigma Aldrich) was used for western blots. The figure shows full molecular weight range. **(C)** These blots complement the cropped blots shown in Supplement Figure 4A.

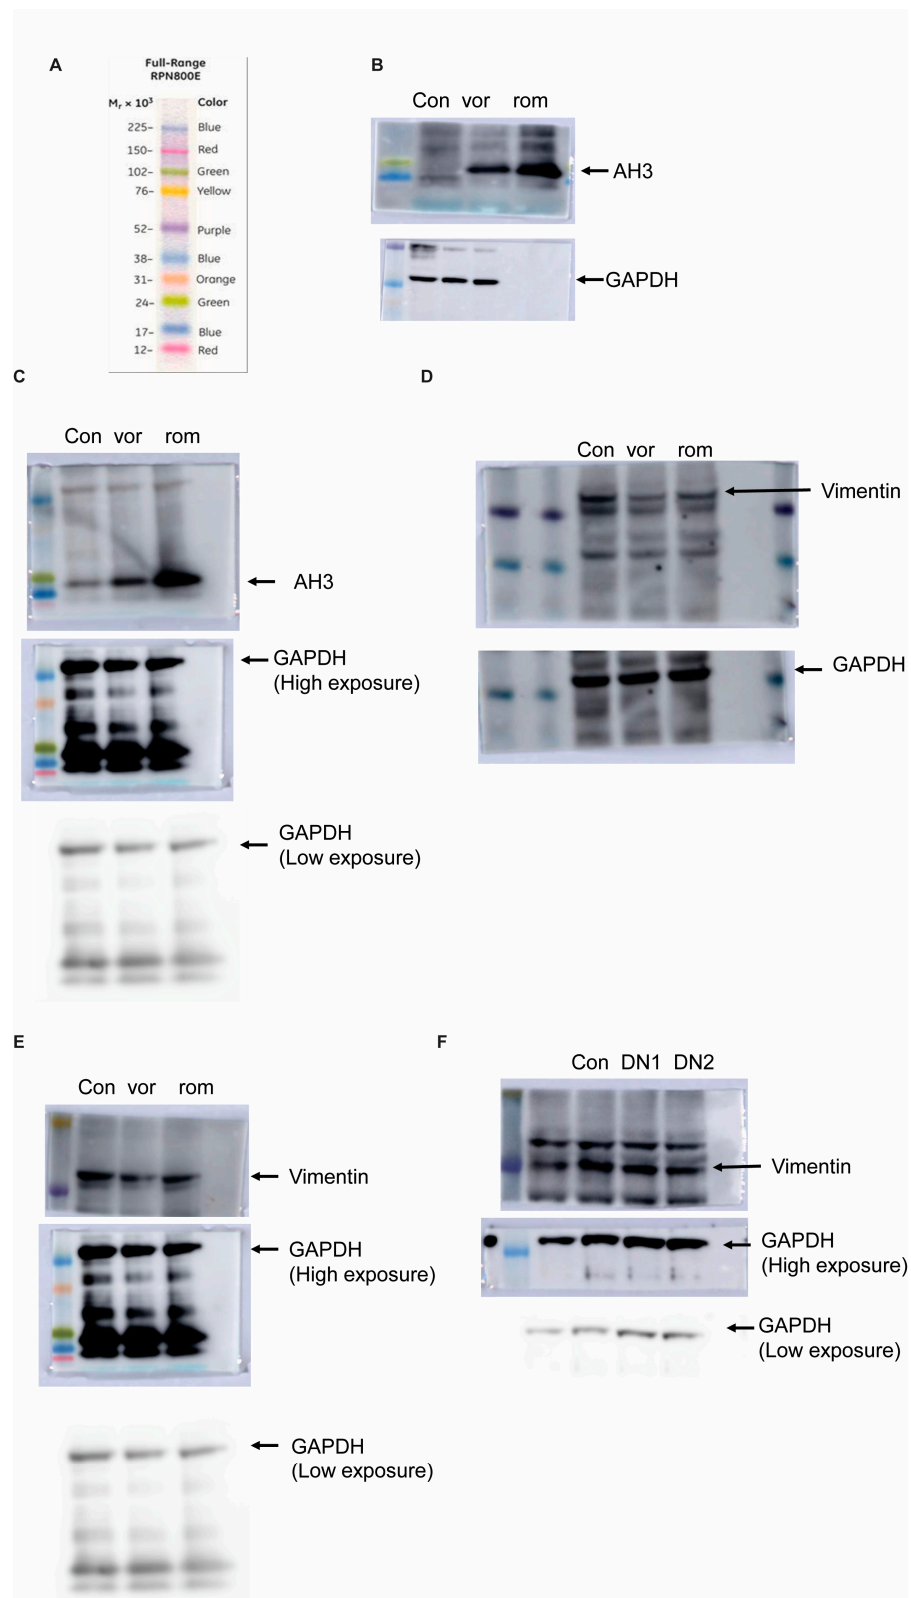

**Figure S5.** Uncropped western blots for Figures 2, 3 and 5. **(A)** Amersham™ ECL™ Rainbow™ Marker (RPN800E, Sigma Aldrich) was used for western blots. **(B)** These blots complement the cropped blots shown in Figure 2B. **(C)** These blots complement the cropped blots shown in Figure 2B. **(D)** These blots complement the cropped blots shown in Figure 3D. **(E)** These blots complement the cropped blots shown in Figure 3D. This blot was developed using same sample as Figure S5C, so loading control is same as Figure S5C. **(F)** These blots complement the cropped blots shown in Figure 5B.

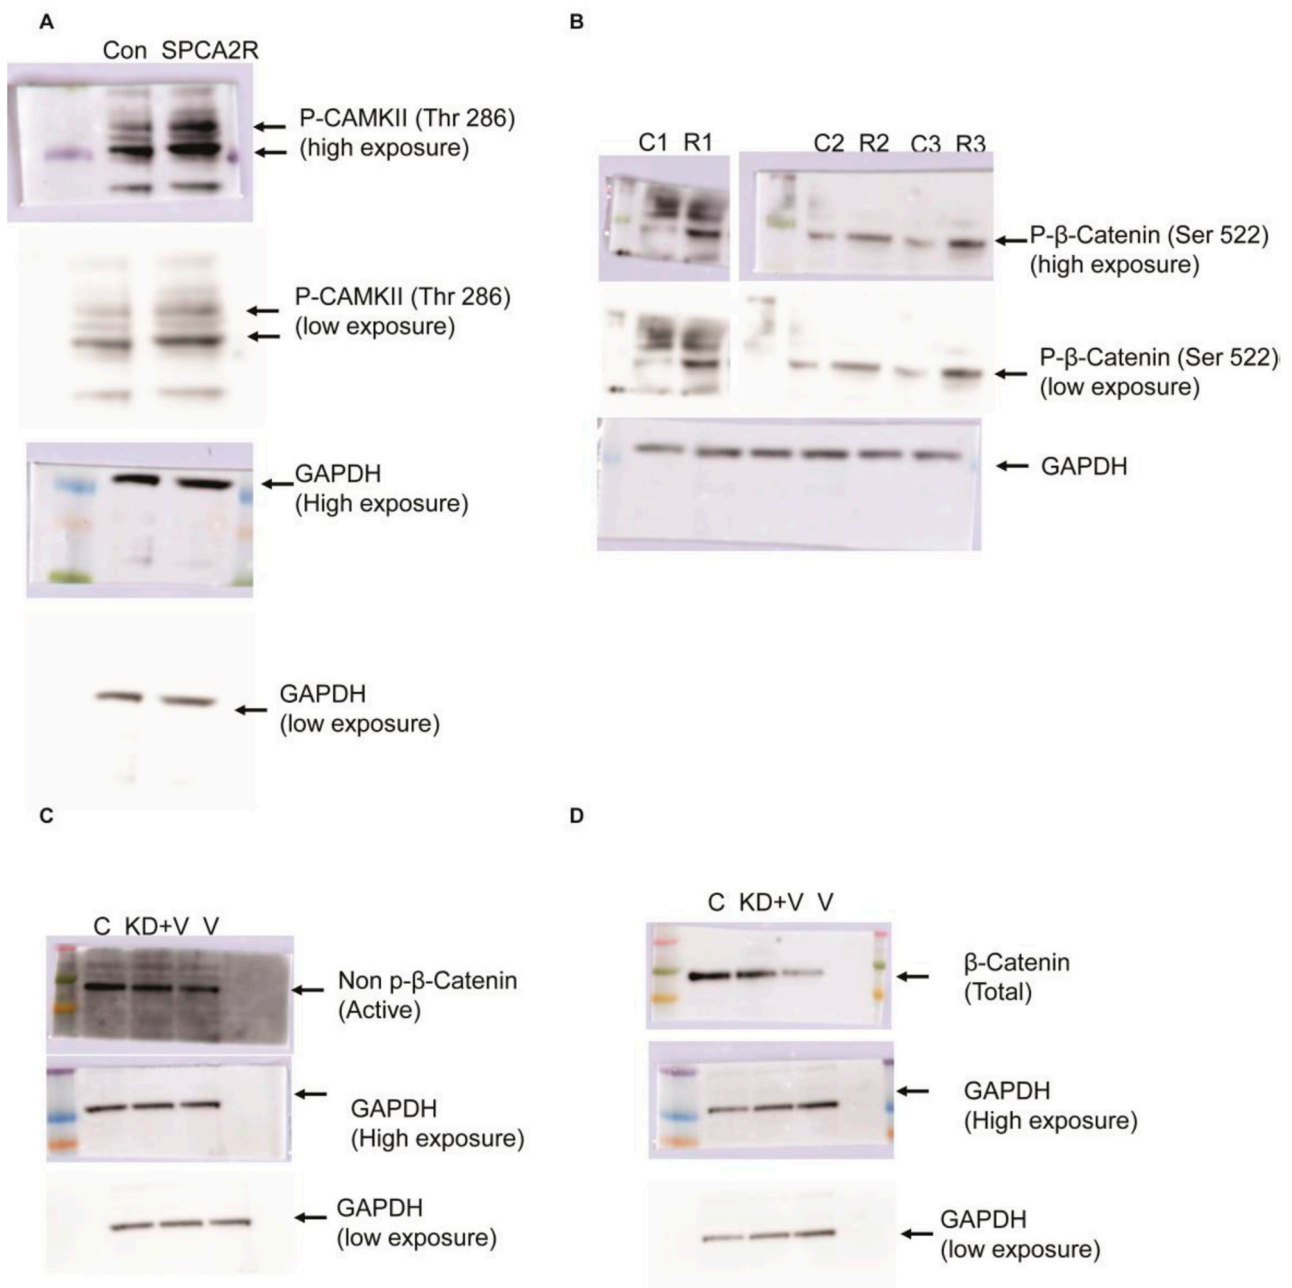

**Figure 6.** Uncropped western blots for Figure 6. **(A)** These blots complement the cropped blots shown in Figure 6B. **(B)** These blots complement the cropped blots (C3 and R3) shown in Figure 6B. **(C)** These blots complement the cropped blots shown in Figure 6J. **(D)** These blots complement the cropped blots shown in Figure 6J.
